# Supplementary material
Source: PubMed Central journal article supplement (PMC2488236)

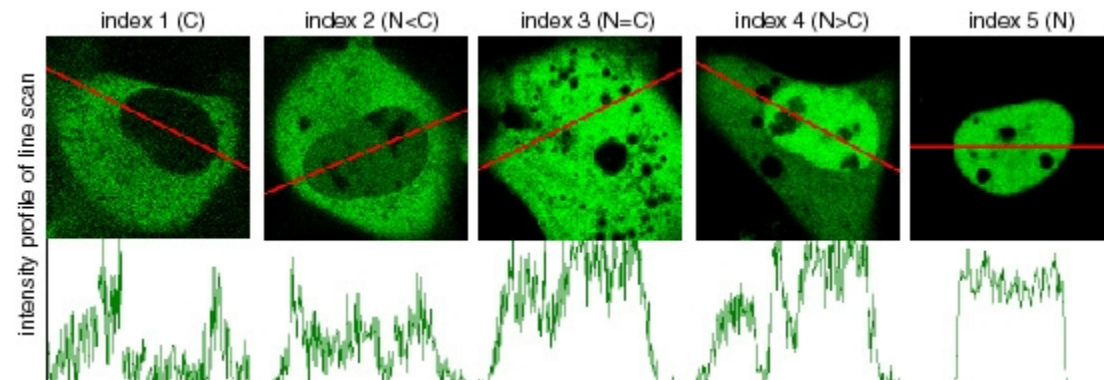

Supplement: en.2008-0137_1.pdf [file en.2008-0137_1.pdf]

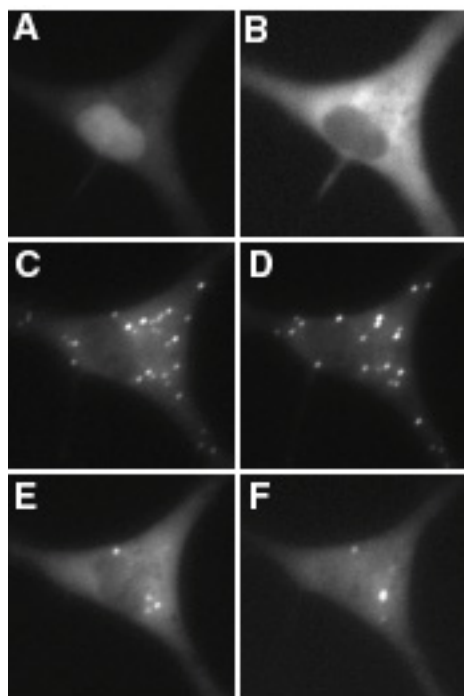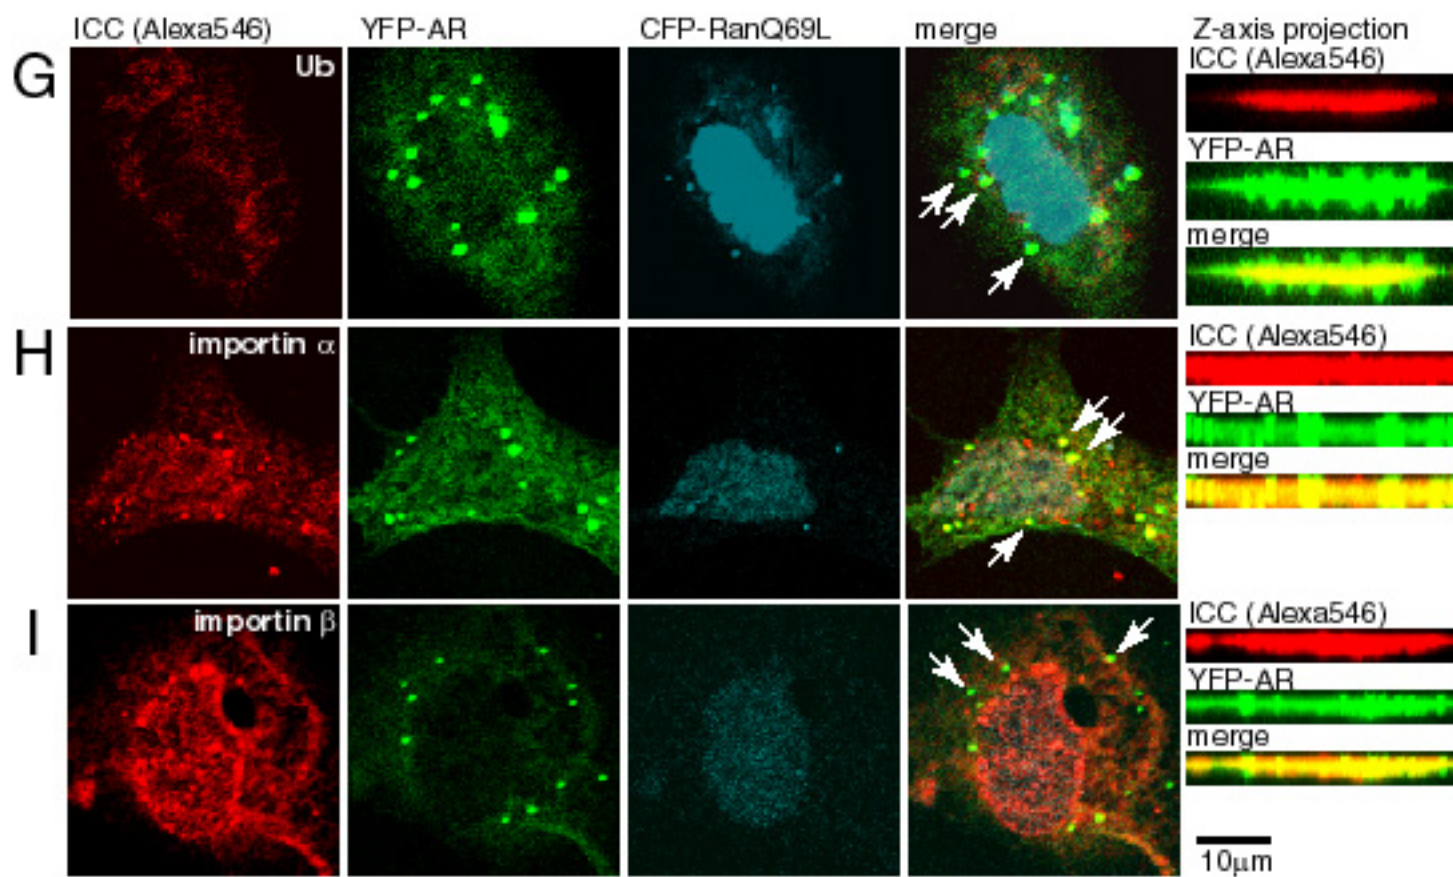

Supplement: en.2008-0137_2.pdf [file en.2008-0137_2.pdf]

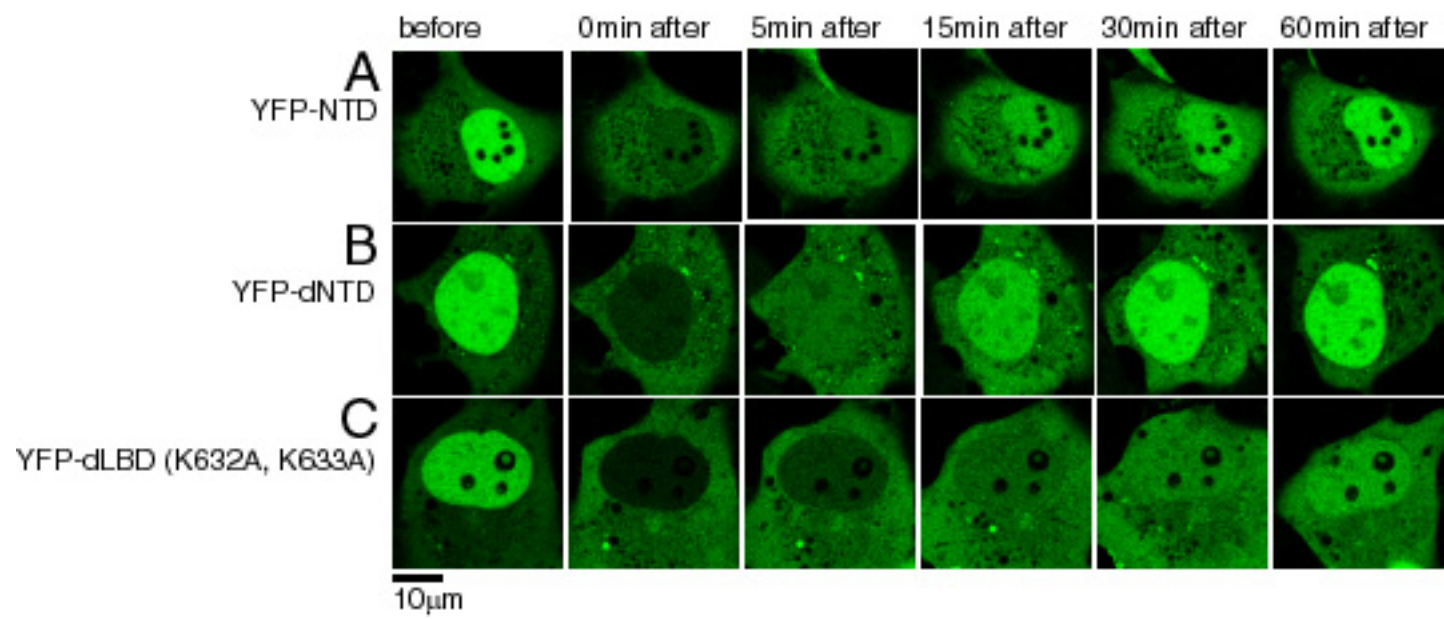

Supplement: en.2008-0137_3.pdf [file en.2008-0137_3.pdf]

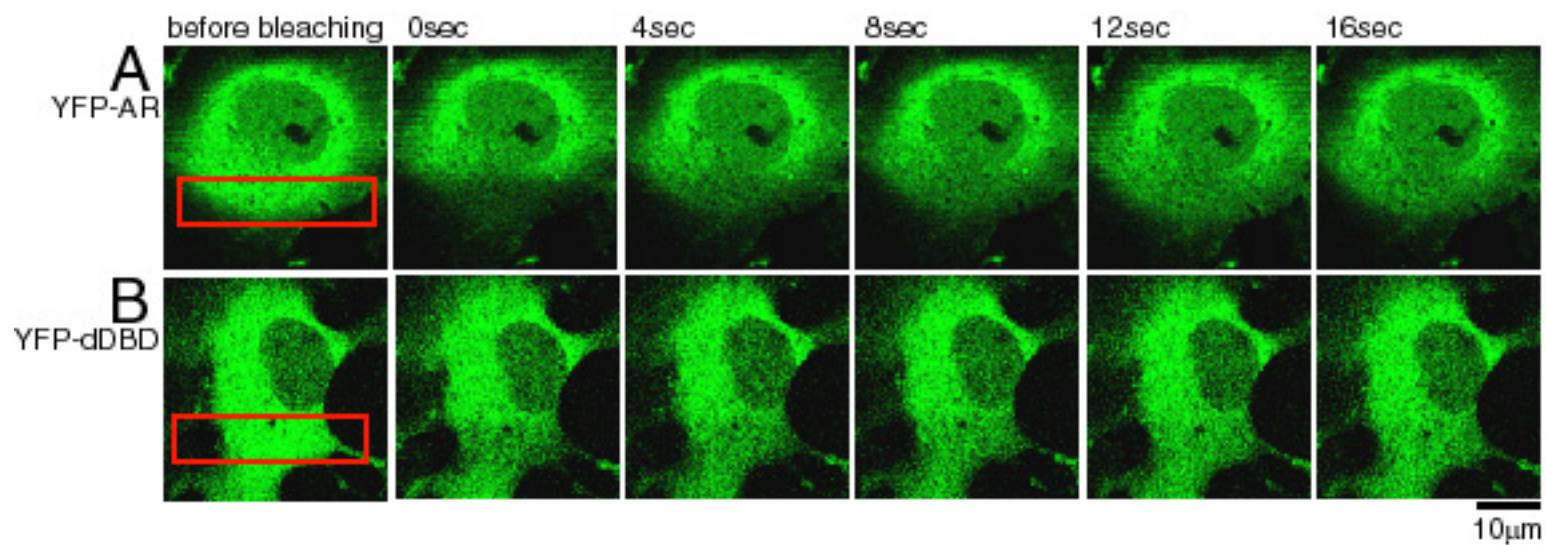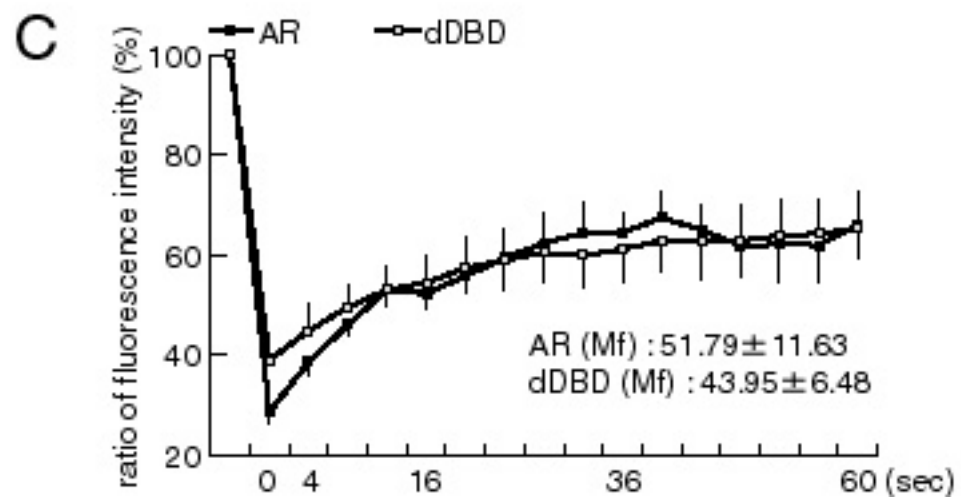

Supplement: en.2008-0137_4.pdf [file en.2008-0137_4.pdf]
